# Supplementary material
Source: PubMed Central journal article supplement (PMC4040540)
Supplement: NIHMS58795-supplement-Supp.pdf [file NIHMS58795-supplement-Supp.pdf]

# Supplemental Figure 1

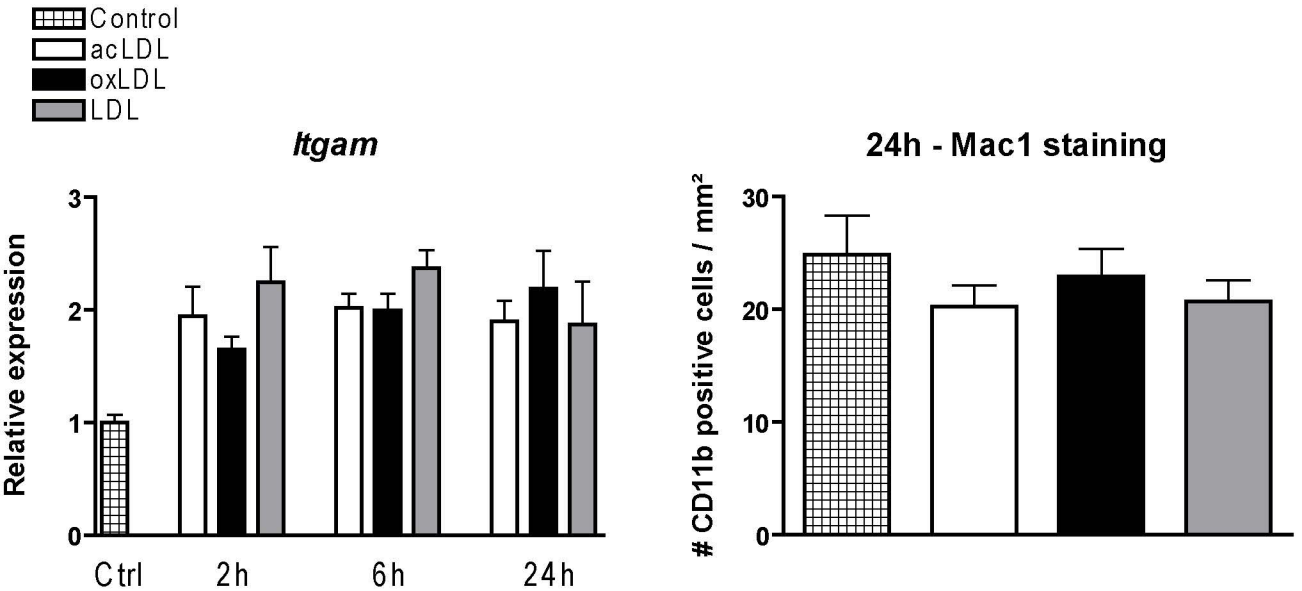

**Supplemental Figure 1: Infiltrating macrophages.** Hepatic gene expression of Integrin alpha-M (*Itgam*) and quantification of histology for infiltrating macrophages (Mac1 staining) after 24h of injection.
